# Supplementary material for: Real-World Attainment of Low-Density Lipoprotein Cholesterol Goals in Patients at High Risk of Cardiovascular Disease Treated with High-Intensity Statins: The TERESA Study
Source: MDPI journal article supplement (doi:10.3390/jcm12093187), 2023-04-28
Supplement: s1 [file s1]

## Supplementary Materials

**Supplementary Figure S1.** Flowchart of the patient selection process

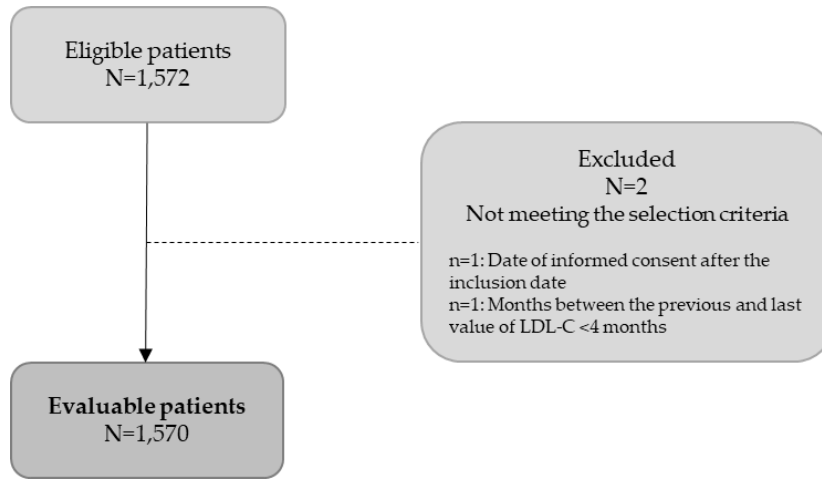

**Supplementary Table S1.** Changes in LLT due to safety reasons (N=57)

| Prior LLT                           | Current LLT  |                             |              |                             | Overall    |
|-------------------------------------|--------------|-----------------------------|--------------|-----------------------------|------------|
|                                     | Rosuvastatin | Rosuvastatin<br>+ ezetimibe | Atorvastatin | Atorvastatin<br>+ ezetimibe |            |
| <b>Rosuvastatin</b>                 | 0 (0.0)      | 3 (5.3)                     | 0 (0.0)      | 2 (3.5)                     | 5 (8.8)    |
| <b>Rosuvastatin<br/>+ ezetimibe</b> | 1 (1.8)      | 0 (0.0)                     | 0 (0.0)      | 0 (0.0)                     | 1 (1.8)    |
| <b>Atorvastatin</b>                 | 9 (15.8)     | 30 (52.6)                   | 1 (1.8)      | 3 (5.3)                     | 43 (75.4)  |
| <b>Atorvastatin +<br/>ezetimibe</b> | 0 (0.0)      | 5 (8.8)                     | 2 (3.5)      | 1 (1.8)                     | 8 (14.0)   |
| <b>Overall</b>                      | 10 (17.7)    | 38 (66.7)                   | 3 (5.3)      | 6 (10.5)                    | 57 (100.0) |

LLT, lipid-lowering therapy.

**Supplementary Table S2.** Clinical characteristics associated with the type of statin therapy (N=1,570)

| Variable                      | Statin therapy        |                       | p-value <sup>1</sup> |
|-------------------------------|-----------------------|-----------------------|----------------------|
|                               | Rosuvastatin<br>N (%) | Atorvastatin<br>N (%) |                      |
| Cardiovascular disease        |                       |                       |                      |
| Yes                           | 600 (49.3)            | 616 (50.7)            | <0.001               |
| No                            | 219 (61.9)            | 135 (38.1)            |                      |
| Arterial hypertension         |                       |                       |                      |
| Yes                           | 604 (52.6)            | 544 (47.4)            | 0.569                |
| No                            | 215 (50.9)            | 207 (49.1)            |                      |
| Familial hypercholesterolemia |                       |                       |                      |
| Yes                           | 88 (72.7)             | 33 (27.3)             | <0.001               |
| No                            | 731 (50.4)            | 718 (49.6)            |                      |
| Chronic kidney disease        |                       |                       |                      |
| Yes                           | 61 (46.2)             | 71 (53.8)             | 0.172                |
| No                            | 758 (52.7)            | 680 (47.3)            |                      |
| Microalbuminuria              |                       |                       |                      |
| Yes                           | 95 (58.3)             | 68 (41.7)             | 0.115                |
| No                            | 724 (51.5)            | 683 (48.5)            |                      |
| Diabetes mellitus             |                       |                       |                      |
| Yes                           | 268 (49.2)            | 277 (50.8)            | 0.090                |
| No                            | 551 (53.8)            | 474 (46.2)            |                      |
| Retinopathy                   |                       |                       |                      |
| Yes                           | 48 (60.8)             | 31 (39.2)             | 0.133                |
| No                            | 771 (51.7)            | 720 (48.3)            |                      |
| Neuropathy                    |                       |                       |                      |
| Yes                           | 23 (51.1)             | 22 (48.9)             | >0.999               |
| No                            | 796 (52.2)            | 729 (47.8)            |                      |

<sup>1</sup>Chi-square
